# Supplementary material
Source: publisher figshare collection journal article supplement (https://karger.figshare.com/articles/dataset/_/3860283)

**Supplemental figure 1:** Genotype distribution (del: deletion; dup: duplication; ENH: enhancer; PM: point mutation)

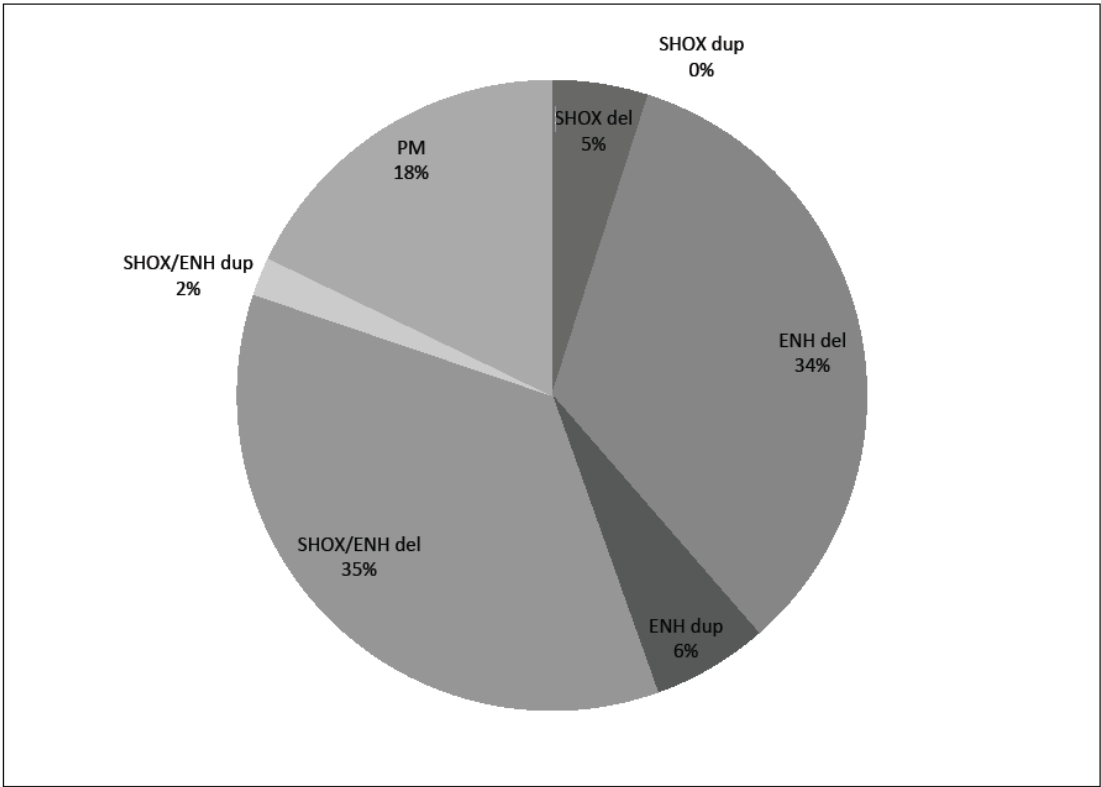

Supplement: Supplementary file 1 [file 1]
