# Supplementary material
Source: publisher figshare collection journal article supplement (https://karger.figshare.com/articles/dataset/_/3860283)
Supplement: Supplementary file 2 [file 1]

**Supplemental table 1. Sequence variants - Point mutations in our population (N=55)**

| EXON         | DNA          | PROTEIN*          | FREQUENCY | REFERENCE**                                                        | PHENOTYPE | PHENOTYPE IN OUR POPULATION                                        |
|--------------|--------------|-------------------|-----------|--------------------------------------------------------------------|-----------|--------------------------------------------------------------------|
| 5'UTR Exon 2 | c.-55C>T     | p.-               | 10/55     | Niesler (2007) Hum Mutat 26(2)-63-8                                | LWD/ISS   | LWD (8 patients) / No sign (1 patient) / Not available (1 patient) |
| 5'UTR Exon 2 | c.-9del      | p.-               | 1/55      | not described                                                      |           | LWD                                                                |
| Exon 2       | c.169C>T     | p.Gln57*          | 1/55      | not described                                                      |           | LWD                                                                |
| Exon 2       | c.178A>C     | p.Thr60Pro        | 2/55      | Huber (2006) J Med Genet 43:735<br>Esoterix (2007) SHOX LSDB entry | ISS       | LWD (IC) / Not available (RC)                                      |
| 5'UTR Exon 2 | c.243G>A     | p.-               | 1/55      | Unpublished                                                        |           | LWD                                                                |
| Exon 2       | c.257dup     | p.Thr87Hisfs*10   | 1/55      | not described                                                      |           | LWD                                                                |
| Intron 2     | c.278-27G>T  | p.-               | 1/55      | not described                                                      |           | LWD                                                                |
| Intron 2     | c.278-89C>T  | p.-               | 1/55      | not described                                                      |           | LWD                                                                |
| Exon 3       | c.334C>T     | p.Gln112*         | 1/55      | Huber (2001) J Med Genet 38:323                                    | LWD       | LWD                                                                |
| Exon 3       | c.391G>T     | p.Glu131*         | 2/55      | Niesler (2007) Hum Mutat 26(2)-63-8                                | LWD/ISS   | LWD                                                                |
| Exon 3       | c.394C>G     | p.Leu132Val       | 3/55      | Grigelioniene (2000) Hum Genet 107:145                             | LWD       | LWD                                                                |
| Exon 3       | c.397-452dup | p.Ser151Argfs*60  | 1/55      | not described<br>Esoterix (2007) SHOX LSDB entry                   |           | LWD                                                                |
| Exon 3       | c.414G>C     | p.Glu138Asp       | 1/55      | Unpublished                                                        | ISS       | LWD                                                                |
| Exon 3       | c.445G>T     | p.Glu149*         | 1/55      | Huber (2001) J Med Genet 38:323                                    | LWD       | LWD                                                                |
| Exon 3       | c.452G>A     | p.Ser151Asn       | 2/55      | not described<br>Esoterix (2007) SHOX LSDB entry                   |           | LWD                                                                |
| Exon 3       | c.479G>T     | p.Arg160Leu       | 1/55      | Unpublished                                                        | LWD/ISS   | LWD                                                                |
| Intron 3     | c.487-2A>G   | p.-               | 2/55      | Niesler (2007) Hum Mutat 26(2)-63-8                                | LWD       | LWD                                                                |
| Exon 4       | c.491G>C     | p.Trp164Ser       | 2/55      | Niesler (2007) Hum Mutat 26(2)-63-8                                | LMD       | LWD (IC) / Not available (RC)                                      |
| Exon 4       | c.508G>C     | p.Ala170Pro       | 4/55      | Sabherwal (2004) J Med Genet 41:e83                                | LWD       | LWD                                                                |
| Exon 4       | c.517C>T     | p.Arg173Cys       | 2/55      | Huber (2001) J Med Genet 38:323                                    | LWD       | LWD                                                                |
| Exon 5       | c.583C>T     | p.Arg195*         | 2/55      | Rao (1997) Nat Genet 16:54                                         | LWD       | LWD (IC) / Not available (RC)                                      |
| Exon 5       | c.584dup     | p.Val196Serfs*195 | 4/55      | not described                                                      |           | ISS (IC) / LWD (RC) / Not available (2 RC)                         |
| Exon 5       | c.586G>C     | p.Val196Leu       | 1/55      | not described                                                      |           | Not available                                                      |
| Exon 5       | c.599T>A     | p.Val200Asp       | 1/55      | not described                                                      |           | LWD                                                                |
| Exon 5       | c.632A>T     | p.Gln211Leu       | 1/55      | not described                                                      |           | LWD                                                                |

|          |             |             |      |                                                |         |               |
|----------|-------------|-------------|------|------------------------------------------------|---------|---------------|
| Intron 5 | c.634-14G>T | p.-         | 1/55 | Esoterix (2007) SHOX LSDB entry<br>Unpublished |         | LWD           |
| Exon 6   | c.676C>T    | p.Pro226Ser | 1/55 | not described                                  |         | Not available |
| Exon 6   | c.755C>A    | p.Ser252*   | 1/55 | Esoterix (2007) SHOX LSDB entry<br>Unpublished | LWD     | LWD           |
| Exon 6a  | c.784G>T    | p.Val262Leu | 2/55 | not described                                  |         | LWD           |
| Exon 6a  | c.827T>C    | p.Ile276Thr | 1/55 | Huber (2006) J Med Genet 43:735                | LWD/ISS | LWD           |

\*According Genome version Hg19 NM\_000451.3

\*\* According The Human Gene Mutation Database (HGMD)

LWD= Leri-Weill dyschondrosteosis; LMD= Langer Mesomelic dysplasia; ISS= Isolated Short Stature; IC= Index Case; RC= Related Case

Not available= missing data to make the difference between ISS and LWD
